# Supplementary material for: Income-Related Mortality Inequalities and Its Social Factors among Middle-Aged and Older Adults at the District Level in Aging Seoul: An Ecological Study Using Administrative Big Data
Source: MDPI journal article supplement (doi:10.3390/ijerph19010383), 2021-12-30
Supplement: s1 [file s1]

**Table S1.** Age-adjusted mortality rate per 100,000 people by income quintile in 25 districts in Seoul for the period of 2014 to 2018 for men aged 45+ (n=2,017,879)

|                 | 1st quintile<br>(Lowest) | 2nd quintile | 3rd quintile | 4th quintile | 5th quintile<br>(Highest) |
|-----------------|--------------------------|--------------|--------------|--------------|---------------------------|
| Seoul           | 9,922                    | 5,948        | 5,223        | 4,390        | 3,617                     |
| Jongno-gu       | 10,928                   | 6,380        | 5,531        | 4,602        | 3,543                     |
| Jung-gu         | 10,998                   | 6,239        | 5,382        | 4,815        | 3,582                     |
| Yongsan-gu      | 11,380                   | 5,729        | 5,393        | 3,996        | 3,108                     |
| Seongdong-gu    | 10,303                   | 5,961        | 5,765        | 4,740        | 3,980                     |
| Gwangjin-gu     | 9,548                    | 6,036        | 5,380        | 4,525        | 3,467                     |
| Dongdaemun-gu   | 11,325                   | 6,222        | 5,578        | 5,302        | 4,374                     |
| Junngang-gu     | 10,839                   | 6,339        | 6,111        | 5,323        | 4,446                     |
| Seongbuk-gu     | 10,376                   | 6,090        | 5,511        | 4,827        | 4,323                     |
| Gangbuk-gu      | 11,896                   | 6,934        | 6,408        | 5,171        | 4,612                     |
| Dobong-gu       | 9,862                    | 5,994        | 5,324        | 4,712        | 4,437                     |
| Nowon-gu        | 11,431                   | 6,320        | 5,205        | 4,825        | 4,563                     |
| Eunpyeong-gu    | 10,236                   | 5,945        | 5,411        | 4,855        | 3,954                     |
| Seodaemun-gu    | 10,388                   | 5,914        | 4,961        | 4,293        | 3,621                     |
| Mapo-gu         | 9,846                    | 6,128        | 5,328        | 4,331        | 3,620                     |
| Yangcheon-gu    | 9,606                    | 6,145        | 4,912        | 4,386        | 3,840                     |
| Gangseo-gu      | 10,885                   | 6,424        | 5,478        | 4,669        | 4,184                     |
| Guro-gu         | 8,811                    | 5,950        | 5,413        | 4,727        | 3,689                     |
| Geumcheon-gu    | 10,314                   | 6,273        | 5,099        | 4,730        | 4,891                     |
| Yeongdeungpo-gu | 9,734                    | 5,595        | 5,169        | 4,003        | 2,998                     |
| Dongjak-gu      | 8,823                    | 5,877        | 4,849        | 4,177        | 3,545                     |
| Gwanak-gu       | 10,124                   | 6,188        | 5,302        | 4,455        | 3,759                     |
| Seocho-gu       | 7,435                    | 4,812        | 3,823        | 3,305        | 2,895                     |
| Gangnam-gu      | 7,795                    | 4,961        | 3,994        | 3,117        | 2,622                     |
| Songpa-gu       | 7,860                    | 4,980        | 4,177        | 3,823        | 3,068                     |
| Gangdong-gu     | 8,985                    | 5,853        | 5,279        | 4,489        | 4,497                     |

**Table S2.** Age-adjusted mortality rate per 100,000 people by income quintile in 25 districts in Seoul for the period of 2014 to 2018 for women aged 45+ (n=2,239,916)

|                 | 1st quintile<br>(Lowest) | 2nd quintile | 3rd quintile | 4th quintile | 5th quintile<br>(Highest) |
|-----------------|--------------------------|--------------|--------------|--------------|---------------------------|
| Seoul           | 4,128                    | 3,185        | 3,120        | 3,091        | 2,879                     |
| Jongno-gu       | 4,248                    | 3,049        | 3,182        | 3,131        | 2,399                     |
| Jung-gu         | 4,604                    | 3,257        | 2,987        | 2,903        | 2,720                     |
| Yongsan-gu      | 4,133                    | 3,184        | 3,098        | 2,809        | 2,621                     |
| Seongdong-gu    | 4,340                    | 3,455        | 2,935        | 3,160        | 3,013                     |
| Gwangjin-gu     | 3,871                    | 3,083        | 3,107        | 3,314        | 2,800                     |
| Dongdaemun-gu   | 4,711                    | 3,462        | 3,196        | 3,181        | 3,070                     |
| Jungnang-gu     | 4,440                    | 3,343        | 3,572        | 3,459        | 3,048                     |
| Seongbuk-gu     | 4,363                    | 3,248        | 3,098        | 3,228        | 2,875                     |
| Gangbuk-gu      | 4,874                    | 3,495        | 3,501        | 3,287        | 3,020                     |
| Dobong-gu       | 4,135                    | 3,310        | 3,251        | 3,185        | 3,197                     |
| Nowon-gu        | 4,556                    | 3,323        | 3,355        | 3,129        | 3,280                     |
| Eunpyeong-gu    | 4,204                    | 3,420        | 3,023        | 3,081        | 3,141                     |
| Seodaemun-gu    | 4,425                    | 3,120        | 3,214        | 3,010        | 2,917                     |
| Mapo-gu         | 4,181                    | 2,989        | 3,036        | 2,950        | 2,594                     |
| Yangcheon-gu    | 3,829                    | 3,336        | 3,356        | 3,220        | 3,259                     |
| Gangseo-gu      | 4,674                    | 3,291        | 3,116        | 3,272        | 3,108                     |
| Guro-gu         | 3,760                    | 3,095        | 3,322        | 3,444        | 3,207                     |
| Geumcheon-gu    | 4,605                    | 3,413        | 3,382        | 2,999        | 3,732                     |
| Yeongdeungpo-gu | 3,990                    | 2,907        | 2,699        | 2,937        | 2,828                     |
| Dongjak-gu      | 3,872                    | 3,212        | 2,803        | 3,099        | 2,996                     |
| Gwanak-gu       | 4,181                    | 3,207        | 3,079        | 3,023        | 3,095                     |
| Seocho-gu       | 3,202                    | 2,813        | 2,867        | 2,761        | 2,485                     |
| Gangnam-gu      | 3,471                    | 2,689        | 2,712        | 2,468        | 2,346                     |
| Songpa-gu       | 3,414                    | 2,751        | 2,981        | 2,988        | 2,997                     |
| Gangdong-gu     | 3,800                    | 3,277        | 3,353        | 3,053        | 2,939                     |
